# Supplementary material
Source: PubMed Central journal article supplement (PMC3593060)
Supplement: NIHMS423418-supplement-1_si_001.pdf [file NIHMS423418-supplement-1_si_001.pdf]

# Supporting Information

## Two Dimensional Window Exchange Umbrella Sampling for Transmembrane Helix Assembly

*Soohyung Park and Wonpil Im\**

Department of Molecular Biosciences and Center for Bioinformatics, The University of Kansas,  
2030 Becker Drive, Lawrence, Kansas 66047, USA

## S1. Sampling of the TM-TM interfaces near the global PMF minimum in 1D-WEUSMD

Sampling of the GpA-TM interfaces can be represented by the rotation angle distribution of Gly79 in each helix,  $P(\theta_1, \theta_2)$ . The rotation angles  $\theta_1$  and  $\theta_2$  are defined as follows. For two helices  $i$  and  $j$ ,  $\theta_1$  is defined by the angle between  $\mathbf{q}^{(j)} - \mathbf{q}^{(i)}$  and  $\mathbf{r}_\alpha^{(i)} - \mathbf{q}^{(i)}$  (Figure S1A), where  $\mathbf{q}^{(i)}$  is the projection of  $\mathbf{r}_\alpha^{(i)}$ , the  $^{79}\text{Gly}$   $\text{C}_\alpha$  position in helix  $i$ , onto its helix axis.  $\theta_2$  is defined similarly. For comparison with the distribution obtained from TRESMD, the configurations sampled in the thermally accessible region (i.e., the  $2k_B T$  region around the global PMF minimum)<sup>1</sup> for the IS1 and IS2 1D-WEUSMDs (8-11 Å in Figure 1A) were analyzed. As shown in Figures S1B-D,  $P(\theta_1, \theta_2)$  from both 1D-WEUSMDs show good agreement with that from TRESMD. For two major peaks shown in  $P(\theta_1, \theta_2)$ , we calculated the root mean square deviation (RMSD) between the representative structures from 1D-WEUSMD and from TRESMD. All the calculated RMSD values are below 1 Å, demonstrating that the sampling in the thermally accessible region from 1D-WEUSMD is comparable to that from TRESMD.

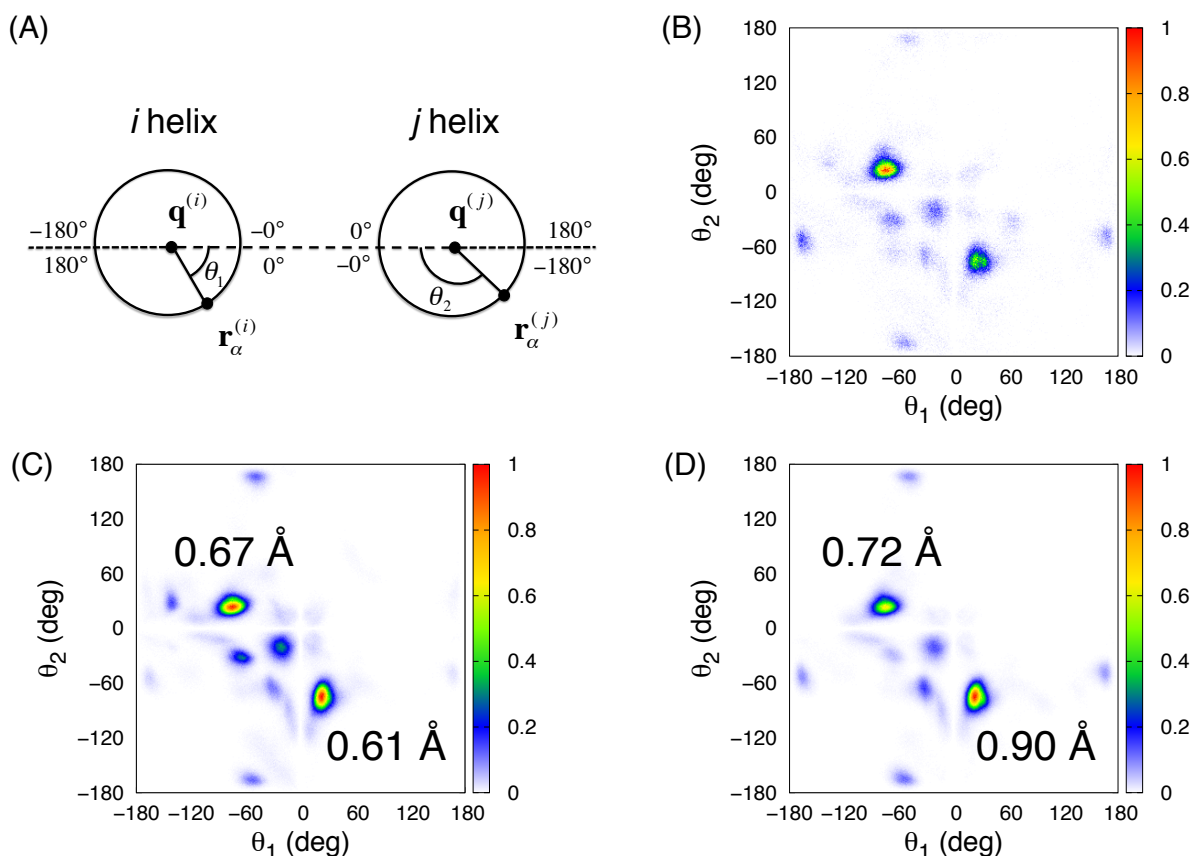

**Figure S1.** (A) Definition of rotation angles  $\theta_1$  and  $\theta_2$ . The population plots of  $\theta_1$  and  $\theta_2$ ,  $P(\theta_1, \theta_2)$ , from (B) TRESMD, (C) IS1 1D-WEUSMD, and (D) IS2 1D-WEUSMD. In (C) and (D), the values of  $\text{C}_\alpha$  RMSD between the representative structures from 1D-WEUSMD and from TRESMD are also shown.

## S2. Exchange bottlenecks in 1D-WEUSMD

In the 1D-WEUSMD simulations, our hypothesis was that the IS1 and IS2 PMFs should be comparable if the WEUSMD has sufficient sampling power, i.e., the results should not depend on the initial configurations. However, as shown in Figure 1A, the discrepancy between the IS1 and IS2 PMFs implies that the sampling at  $r_{\text{HH}} < 8 \text{ \AA}$  is incomplete. To find out the cause, we analyzed replicas' walk along  $r_{\text{HH}}$  by making histograms of replicas' position along  $r_{\text{HH}}$ . As shown in Figure S2, bottlenecks of window exchange in 1D-WEUSMD exist around  $r_{\text{HH}} = 8 \text{ \AA}$  for both IS1 and IS2, which lowers the WEUSMD performance. Consequently, the PMF converged slowly for the IS1 because of more severe bottlenecks than in IS2 (Figure S3A). And, the sampling is incomplete at short  $r_{\text{HH}}$  during the 200-ns simulation time (Figures S3C and S3D). The origin of such bottlenecks can be attributed to the high barriers along the helix-helix crossing angle ( $\Omega$ ) at short  $r_{\text{HH}}$ .

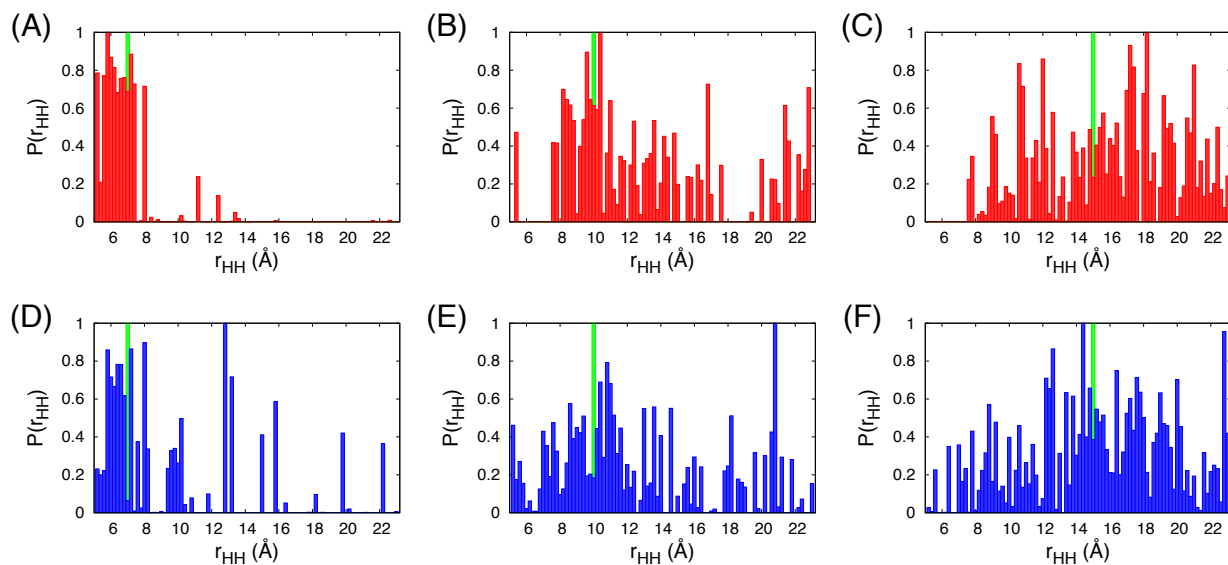

**Figure S2.** The histograms of the initial locations of the replicas (at  $t = 80 \text{ ns}$ ) that visited the windows at  $r_{\text{HH}} = 7, 10, \text{ and } 15 \text{ \AA}$  (green bars) for (A-C) IS1 and (D-F) IS2, respectively.

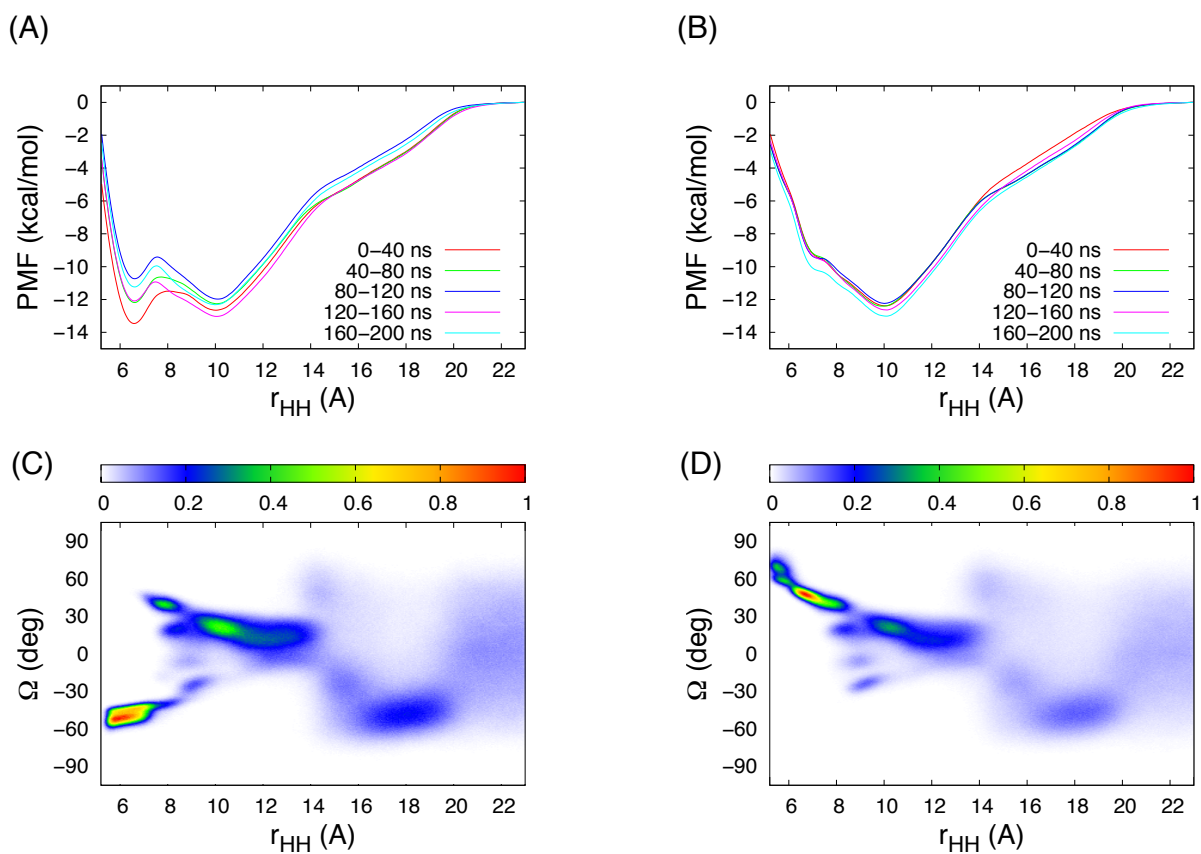

**Figure S3.** The block-averaged PMFs from (A) IS1 and (B) IS2 1D-WEUSMDs. The population in  $r_{HH}$  and  $\Omega$ ,  $P(r_{HH}, \Omega)$ , from (C) IS1 and (D) IS2 1D-WEUSMDs. The inconsistency between the results from the IS1 and IS2 WEUSMDs can be attributed to the high barriers along  $\Omega$  at short  $r_{HH}$ .

### S3. Additional results from 2D-WEUSMD

Here, we provide additional results from 2D-WEUSMD: (i) the block-averaged PMFs for two time intervals, (ii) the RMSD obtained from the last seven 10-ns block-averaged PMFs, (iii) the PMF along  $\Omega$  at several  $r_{\text{HH}} (\geq 9 \text{ \AA})$ , and (iv) the overlay of the boundary contour lines for B1 and B2 basins (defined based on the 2D-PMF) with  $P(r_{\text{HH}}, \Omega)$  from TREXMD. The time evolution of the 2D-PMF can be monitored by the series of the block-averaged 2D-PMFs. As shown in Figures S4A and S4B, the initially strong PMF minimum corresponding to the NMR structure became weaker and the other PMF minima corresponding to  $P(r_{\text{HH}}, \Omega)$  from TREXMD developed as the simulation time increased. The 2D-PMF converged after 30 ns, as shown in Figure S4C, faster than that for 1D-WEUSMD. Figure S4D shows the 1D-PMFs along  $\Omega$  at several  $r_{\text{HH}}$  (shown in legends), where the barrier along  $\Omega$  from right-handed to left-handed (and vice versa) conformations of GpA-TM is negligible at  $r_{\text{HH}} > 10 \text{ \AA}$ . The density in  $r_{\text{HH}}$  and  $\Omega$ ,  $\rho(r_{\text{HH}}, \Omega)$ , from 2D-WEUSMD (Figure S4E) shows a good agreement with  $P(r_{\text{HH}}, \Omega)$  from TREXMD (Figure S4F), where the latter was excellently represented by the B1 basin.

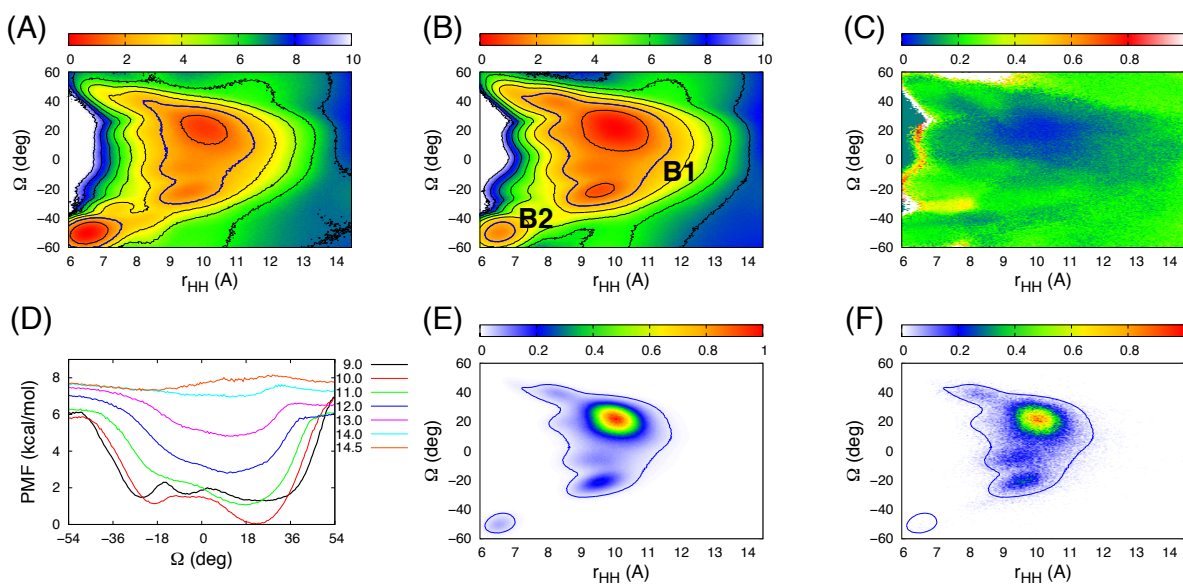

**Figure S4.** The block-averaged PMFs from 2D-WEUSMD for (A) 0-30 ns and (B) 30-100 ns. (C) The RMSD of the 2D-PMF (in kcal/mol) calculated from the last seven 10-ns block-averaged PMFs. (D) The PMFs along  $\Omega$  at several  $r_{\text{HH}}$  (shown in legends). The overlay of the boundary of the basins B1 and B2 on (E)  $\rho(r_{\text{HH}}, \Omega)$  from 2D-WEUSMD and (F)  $P(r_{\text{HH}}, \Omega)$  from TREXMD at  $T=300 \text{ K}$ . The contour lines are shown at every 1.2 kcal/mol in (A) and (B).

#### S4. Two most probable pathways along $r_{\text{HH}}$ and $\Omega$

Based on the 2D-PMF, two most probable pathways  $L_1$  and  $L_2$  along  $r_{\text{HH}}$  and  $\Omega$  ( $\Omega < 0^\circ$  or  $\Omega > 0^\circ$  at short  $r_{\text{HH}}$ , respectively) were obtained by the modified string method,<sup>2</sup> as described below. Initially, the value of  $\Omega$  for the end point at  $r_{\text{HH}} = 14.5 \text{ \AA}$  was set to  $0^\circ$  and those at  $r_{\text{HH}} = 6 \text{ \AA}$  were set to  $-60^\circ$  and  $60^\circ$  for the  $L_1$  and  $L_2$ , respectively. Then, a total of 51 points were distributed evenly along the initial pathways given by the lines connecting these end points. During Monte Carlo (MC) simulations, these points were allowed to move along both  $r_{\text{HH}}$  and  $\Omega$  except the end points that were allowed to move only along  $\Omega$ . The points were relocated along the pathway evenly after each MC step. After 20,000 MC steps, we obtained a final pathway. A total of 1,000 such final independent pathways for the two pathways were used to obtain the average pathways  $L_1$  and  $L_2$  (shown in Figure 2A). These pathways are also shown in Figure S5A. The per-point deviation (PPD) of the each pathway from the average,  $d(i)$ , was calculated by

$$d(i) = \frac{1}{N} \sqrt{\sum_{k=1}^N \left[ \left( \frac{r_{\text{HH},k}(i) - \bar{r}_{\text{HH},k}}{\delta r_{\text{HH}}} \right)^2 + \left( \frac{\Omega_k(i) - \bar{\Omega}_k}{\delta \Omega} \right)^2 \right]} \quad (\text{S1})$$

where  $N = 51$  is the total number of data points along the path and  $i$  is the index number for the independent MC runs ( $i = 1, 2, \dots, 1000$ ) with 20,000 step each.  $\bar{r}_{\text{HH},k}$  and  $\bar{\Omega}_k$  are the positions of the  $k$ -th data point along the average path, and  $\delta r_{\text{HH}}$  and  $\delta \Omega$  are the intervals between the grid points along  $r_{\text{HH}}$  and  $\Omega$ , respectively. We defined the average path ensemble as a set of paths with  $d(i) < 0.8 d_{\text{mp}}$ , where the factor 0.8 is determined empirically and  $d_{\text{mp}}$  is the most probable PPD obtained from the histogram of  $d(i)$ 's (shown in Figure S5B). Statistical analysis for the average path PMFs was performed on the basis of these ensembles.

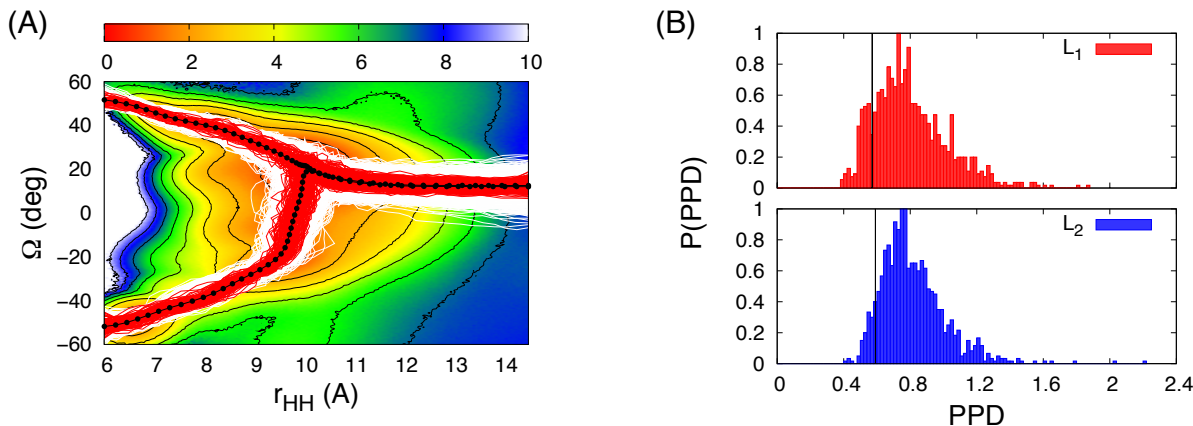

**Figure S5.** (A) Two sets of 1,000 independent GpA-TM assembly pathways (white) are mapped on the 2D-PMF. Also shown are the average pathways  $L_1$  and  $L_2$  (black) and the corresponding ensemble of each path (red). The 2D-PMF contour lines are shown at every 1.2 kcal/mol. (B) The histograms of the per-point deviation (PPD) for the sampled pathways for the  $L_1$  and  $L_2$ . The black vertical lines are the cutoff PPD values, i.e.,  $d_{\text{cut}} = 0.8 d_{\text{mp}}$ .

## REFERENCES

- (1) Park, S.; Kim, T.; Im, W. Transmembrane helix assembly by window exchange umbrella sampling. *Phys. Rev. Lett.* **2012**, *108*, 108102.
- (2) Jo, S.; Rui, H.; Lim, J. B.; Klauda, J. B.; Im, W. Cholesterol flip-flop: insights from free energy simulation studies. *J. Phys. Chem. B* **2010**, *114*, 13342-13348.
